# Supplementary material
Source: Springer Nature journal article supplement (https://www.springermedizin.de/resource/supplementary/12874_2012_914_MOESM7_ESM.pdf/9433050)

Breast Cancer

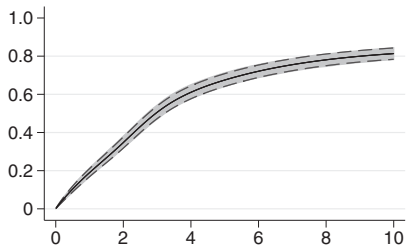

Other Cancer

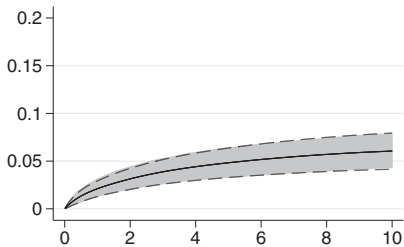

Heart Disease

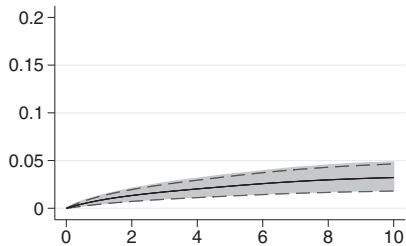

Other Causes

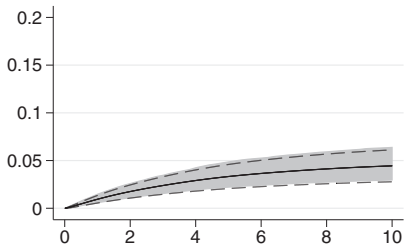

Time since diagnosis (years)

Supplement: MOESM7 [file 9433050]
